# Supplementary material
Source: PubMed Central journal article supplement (PMC2903422)
Supplement: supp_M110.113597_jbc.M110.113597-1.pdf [file supp_M110.113597_jbc.M110.113597-1.pdf]

## SUPPLEMENTAL TABLE

**Table S1** Identification of the mass peaks observed in MALDI-TOF mass spectra (Fig. S3). Based upon observed m/z, peptides are identified using a PAWS program and listed together with the theoretical m/z. Confirmation of the m/z-based identification is performed by MS/MS analysis in some peptides shown in the list. Although four amino acids (Gly-Ser-His-Met) remain at the N-terminus even after removal of a tag with thrombin agarose, numbering of the amino acid residue is based upon an SOD1 sequence starting from Ala.

| WT                  |                 |              |       | A4V                 |                 |              |       |
|---------------------|-----------------|--------------|-------|---------------------|-----------------|--------------|-------|
| Amino acid residues | Theoretical m/z | Observed m/z | MS/MS | Amino acid residues | Theoretical m/z | Observed m/z | MS/MS |
| 1-16                | 1542.8          | 1542.9       | yes   | 137-153             | 1587.8          | 1587.8       | yes   |
| 136-152             | 1587.9          | 1587.9       |       | 135-153             | 1816.9          | 1816.9       | yes   |
| 17-30               | 1602.8          | 1602.9       |       | 134-153             | 1904            | 1904         |       |
| 0-16                | 1673.9          | 1673.9       | yes   | -3-16               | 1983            | 1983         | yes   |
| 134-153             | 1904            | 1904.1       |       | 129-153             | 2390.2          | 2390.1       |       |
| -3-16               | 1955            | 1955         | yes   | 127-153             | 2575.3          | 2575.2       |       |
| 17-34 or 18-35      | 2032            | 2032.1       |       |                     |                 |              |       |
| 17-37               | 2330.2          | 2330.3       | yes   |                     |                 |              |       |
| 129-153             | 2390.2          | 2390.3       | yes   |                     |                 |              |       |
| 127-153             | 2575.3          | 2575.4       | yes   |                     |                 |              |       |
| 91-116              | 2686.3          | 2686.4       | yes   |                     |                 |              |       |
| 91-117              | 2799.4          | 2799.5       | yes   |                     |                 |              |       |
| 89-116              | 2872.4          | 2872.5       | yes   |                     |                 |              |       |
| 88-116              | 2973.4          | 2973.6       | yes   |                     |                 |              |       |
| 89-117              | 2985.5          | 2985.6       |       |                     |                 |              |       |
| 87-116              | 3072.5          | 3072.6       | yes   |                     |                 |              |       |
| 88-117              | 3086.5          | 3086.6       | yes   |                     |                 |              |       |
| 91-120              | 3134.6          | 3134.7       |       |                     |                 |              |       |
| -1-28               | 3167.6          | 3167.7       |       |                     |                 |              |       |
| 87-117              | 3185.6          | 3185.7       | yes   |                     |                 |              |       |
| -3-29               | 3410.7          | 3410.9       |       |                     |                 |              |       |
| -3-30               | 3538.8          | 3539         |       |                     |                 |              |       |

  

| G37R                |                 |              |       |
|---------------------|-----------------|--------------|-------|
| Amino acid residues | Theoretical m/z | Observed m/z | MS/MS |
| 1-16                | 1542.8          | 1542.8       |       |
| 137-153             | 1587.8          | 1587.8       | yes   |
| 17-30               | 1602.8          | 1602.8       | yes   |
| 127-143             | 1649.8          | 1649.7       |       |
| 136-153             | 1715.9          | 1715.9       |       |
| 135-153             | 1817            | 1816.9       | yes   |
| 134-153             | 1904            | 1904         | yes   |
| -3-16               | 1955            | 1954.9       | yes   |
| 129-153             | 2390.2          | 2390.1       | yes   |
| 127-153             | 2575.3          | 2575.2       | yes   |
| -3-29               | 3410.7          | 3410.7       | yes   |

| G41D                |                 |              |       |
|---------------------|-----------------|--------------|-------|
| Amino acid residues | Theoretical m/z | Observed m/z | MS/MS |
| 1-16                | 1542.8          | 1542.8       | yes   |
| 137-153             | 1587.8          | 1587.8       |       |
| 0-16                | 1673.9          | 1673.9       | yes   |
| 1-18                | 1769            | 1768.9       |       |
| 135-153             | 1816.9          | 1817         |       |
| 134-153             | 1904            | 1904         |       |
| -3-16               | 1955            | 1955         |       |
| 15-35               | 2330.2          | 2330.1       | yes   |
| 129-153             | 2390.2          | 2390.2       |       |
| 127-153             | 2575.3          | 2575.3       |       |
| 90-115              | 2799.4          | 2799.5       |       |
| 24-49               | 2872.4          | 2872.5       |       |
| 71-98               | 2973.4          | 2973.4       |       |
| 88-116              | 3072.5          | 3072.5       |       |
| 71-99               | 3086.5          | 3086.5       |       |
| -3-29               | 3410.7          | 3410.8       |       |
| -3-30               | 3538.8          | 3538.9       |       |

| G41S                |                 |              |       |
|---------------------|-----------------|--------------|-------|
| Amino acid residues | Theoretical m/z | Observed m/z | MS/MS |
| 1-16                | 1542.8          | 1542.8       |       |
| 137-153             | 1587.8          | 1587.8       |       |
| 0-16                | 1673.9          | 1673.9       |       |
| 1-18                | 1769            | 1768.9       |       |
| 135-153             | 1816.9          | 1817         |       |
| 134-153             | 1904            | 1904         |       |
| -3-16               | 1955            | 1955         | yes   |
| 107-125             | 2065            | 2065         |       |
| 129-153             | 2390.2          | 2390.2       |       |
| 127-153             | 2575.3          | 2575.3       |       |
| 24-49               | 2872.4          | 2872.5       |       |
| 71-98               | 2973.4          | 2973.4       |       |
| -3-29               | 3410.7          | 3410.8       |       |
| -3-30               | 3538.8          | 3538.9       |       |

| H46R                |                 |              |       |
|---------------------|-----------------|--------------|-------|
| Amino acid residues | Theoretical m/z | Observed m/z | MS/MS |
| 1-16                | 1542.8          | 1542.8       | yes   |
| 137-153             | 1587.8          | 1587.8       |       |
| 0-16                | 1673.9          | 1673.9       | yes   |
| 134-153             | 1904            | 1904         |       |
| -3-16               | 1955            | 1955         | yes   |
| 15-35               | 2330.2          | 2330.1       |       |
| 129-153             | 2390.2          | 2390.2       |       |
| 127-153             | 2575.3          | 2575.3       |       |
| 90-115              | 2799.4          | 2799.5       |       |
| 24-49               | 2872.4          | 2872.5       |       |
| 71-98               | 2973.4          | 2973.4       |       |
| -3-29               | 3410.7          | 3410.8       |       |

| G93R                |                 |              |       |
|---------------------|-----------------|--------------|-------|
| Amino acid residues | Theoretical m/z | Observed m/z | MS/MS |
| 1-16                | 1542.8          | 1542.8       | yes   |
| 137-153             | 1587.8          | 1587.8       | yes   |
| 17-30               | 1602.8          | 1602.8       |       |
| 0-16                | 1673.9          | 1673.9       | yes   |
| -3-16               | 1955            | 1955         | yes   |
| 97-117 or 98-118    | 2214.1          | 2214.1       |       |
| 93-114 or 94-115    | 2285.1          | 2285.1       |       |
| 129-153             | 2390.2          | 2390.2       | yes   |
| 94-117              | 2499.3          | 2499.2       | yes   |
| 127-153             | 2575.3          | 2575.3       |       |
| 94-119              | 2697.4          | 2697.4       |       |
| 94-120              | 2834.5          | 2834.4       | yes   |
| 113-141 or 117-145  | 2953.5          | 2953.6       |       |
| 94-121              | 2963.5          | 2963.5       |       |
| 88-115 or 89-116    | 2971.5          | 2971.4       |       |
| 88-116              | 3072.5          | 3072.5       |       |
| 89-117              | 3084.6          | 3084.6       |       |
| 94-122              | 3091.6          | 3091.6       |       |
| 88-117              | 3185.6          | 3185.6       |       |
| 94-125 or 96-127    | 3392.7          | 3392.7       |       |
| -3-29               | 3410.7          | 3410.8       |       |

| G85R                |                 |              |       |
|---------------------|-----------------|--------------|-------|
| Amino acid residues | Theoretical m/z | Observed m/z | MS/MS |
| 1-16                | 1542.8          | 1542.7       |       |
| 137-153             | 1587.8          | 1587.8       | yes   |
| 14-30               | 1602.8          | 1602.8       | yes   |
| 72-86               | 1678.8          | 1678.8       |       |
| 118-133             | 1696.8          | 1696.8       |       |
| 118-134             | 1783.8          | 1783.8       |       |
| 117-133             | 1809.9          | 1809.8       | yes   |
| 123-141             | 1820.8          | 1820.8       |       |
| 21-37               | 1843            | 1842.9       |       |
| 118-135             | 1884.9          | 1884.9       | yes   |
| 117-134             | 1896.9          | 1896.9       | yes   |
| 87-105              | 1919.9          | 1919.9       | yes   |
| -3-16               | 1955            | 1955         | yes   |
| 117-135             | 1998            | 1997.9       | yes   |
| 17-34 or 18-35      | 2032            | 2032         |       |
| 97-116              | 2101            | 2101         | yes   |
| 118-137             | 2114            | 2114         |       |
| 117-136             | 2126.1          | 2126         |       |
| 116-136 or 117-137  | 2227.1          | 2227.1       |       |
| 68-87               | 2286.2          | 2286.2       |       |
| 84-105 or 85-106    | 2303.2          | 2303.1       |       |
| 94-116              | 2386.2          | 2386.2       |       |
| 127-153             | 2575.3          | 2575.3       | yes   |
| 91-116              | 2686.3          | 2686.3       | yes   |
| 91-117              | 2799.4          | 2799.4       |       |
| 89-116              | 2872.4          | 2872.4       | yes   |
| 88-116              | 2973.4          | 2973.4       |       |
| 87-116              | 3072.5          | 3072.5       | yes   |
| 88-117              | 3086.5          | 3086.5       |       |

| L126X                      |                 |              |       |
|----------------------------|-----------------|--------------|-------|
| Amino acid residues        | Theoretical m/z | Observed m/z | MS/MS |
| 1-16                       | 1542.8          | 1542.9       | yes   |
| 112-125                    | 1565.9          | 1566         |       |
| 17-30                      | 1602.8          | 1603         |       |
| 0-16                       | 1673.9          | 1674         | yes   |
| -3-16                      | 1955            | 1955.1       | yes   |
| 106-125                    | 2178.1          | 2178.3       | yes   |
| 16-36 or 17-37 or 18-38    | 2330.2          | 2330.4       |       |
| 94-116                     | 2386.2          | 2386.4       |       |
| 94-117 or 95-118           | 2499.3          | 2499.5       |       |
| 87-111                     | 2532.2          | 2532.4       |       |
| 91-116                     | 2686.3          | 2686.6       | yes   |
| 91-117                     | 2799.4          | 2799.7       |       |
| 86-113 or 88-115 or 89-116 | 2872.4          | 2872.6       |       |
| 88-116                     | 2973.4          | 2973.7       | yes   |
| 87-116                     | 3072.5          | 3072.8       | yes   |
| 88-117                     | 3086.5          | 3086.8       |       |
| 96-124 or 97-125           | 3107.6          | 3107.8       |       |
| 87-117                     | 3185.6          | 3185.9       |       |
| 94-125                     | 3392.7          | 3393         | yes   |
| -3-29                      | 3410.7          | 3411.1       | yes   |
| -3-30                      | 3536.8          | 3539.1       |       |
| 91-125                     | 3692.8          | 3693.2       | yes   |
| 89-125                     | 3878.9          | 3879.3       |       |
| 88-125                     | 3979.9          | 3980.4       | yes   |

| L144F                   |                 |              |       |  |
|-------------------------|-----------------|--------------|-------|--|
| Amino acid residues     | Theoretical m/z | Observed m/z | MS/MS |  |
| 138-153                 | 1520.8          | 1520.8       |       |  |
| 1-16                    | 1542.8          | 1542.9       | yes   |  |
| 17-30                   | 1602.8          | 1602.9       |       |  |
| 137-153                 | 1621.8          | 1621.8       | yes   |  |
| 0-16                    | 1673.9          | 1673.9       |       |  |
| -3-16                   | 1955            | 1955         | yes   |  |
| 97-116                  | 2101.1          | 2101.1       | yes   |  |
| 97-117 or 98-118        | 2214.1          | 2214.1       |       |  |
| 16-36 or 17-37 or 18-38 | 2330.2          | 2330.3       |       |  |
| 94-116                  | 2386.2          | 2386.2       | yes   |  |
| 128-152                 | 2424.2          | 2424.2       |       |  |
| 93-116                  | 2443.2          | 2443.2       | yes   |  |
| 94-117                  | 2499.3          | 2499.3       | yes   |  |
| 93-117                  | 2556.3          | 2556.3       |       |  |
| 91-116                  | 2686.3          | 2686.3       | yes   |  |
| 91-117                  | 2799.4          | 2799.4       | yes   |  |
| 89-116                  | 2872.4          | 2872.4       | yes   |  |
| 88-116                  | 2973.4          | 2973.4       | yes   |  |
| 89-117                  | 2985.4          | 2985.5       | yes   |  |
| 87-116                  | 3072.5          | 3072.5       | yes   |  |
| 88-117                  | 3086.5          | 3086.5       | yes   |  |
| 91-120                  | 3134.6          | 3134.6       | yes   |  |
| -1-28                   | 3167.6          | 3167.6       |       |  |
| 87-117                  | 3185.6          | 3185.6       | yes   |  |
| 89-120                  | 3320.7          | 3320.7       | yes   |  |
| 91-122                  | 3391.7          | 3391.7       |       |  |
| -3-29                   | 3410.7          | 3410.7       | yes   |  |
| 88-120                  | 3421.7          | 3421.8       | yes   |  |
| 87-120                  | 3520.8          | 3520.8       | yes   |  |
| -3-30                   | 3538.8          | 3538.8       |       |  |
| 90-124 or 91-125        | 3692.8          | 3692.8       |       |  |
| 87-122                  | 3777.9          | 3778         |       |  |

| I149T                      |                 |              |       |  |
|----------------------------|-----------------|--------------|-------|--|
| Amino acid residues        | Theoretical m/z | Observed m/z | MS/MS |  |
| 1-16                       | 1542.8          | 1542.9       | yes   |  |
| 17-30                      | 1602.8          | 1602.9       |       |  |
| 0-16                       | 1673.9          | 1673.9       | yes   |  |
| 26-44                      | 1949.1          | 1949.1       | yes   |  |
| -3-16                      | 1955            | 1955         | yes   |  |
| 17-34 or 18-35             | 2032            | 2032.1       |       |  |
| 25-44                      | 2036.1          | 2036.1       |       |  |
| 24-44                      | 2165.1          | 2165.2       |       |  |
| 17-37                      | 2330.2          | 2330.3       | yes   |  |
| 21-44                      | 2550.3          | 2550.4       |       |  |
| 92-116                     | 2558.2          | 2558.3       |       |  |
| 91-116                     | 2686.3          | 2686.4       |       |  |
| 91-117                     | 2799.4          | 2799.5       |       |  |
| 86-113 or 88-115 or 89-116 | 2872.4          | 2872.5       |       |  |
| 87-115                     | 2971.5          | 2971.5       |       |  |
| 89-117                     | 2985.5          | 2985.5       |       |  |
| 88-117                     | 3086.5          | 3086.6       |       |  |
| 91-120                     | 3134.6          | 3134.7       |       |  |
| 87-117 or 88-118           | 3185.6          | 3185.6       |       |  |
| 94-125 or 96-127           | 3392.7          | 3392.9       |       |  |
| -3-29                      | 3410.7          | 3410.8       |       |  |
| -3-30                      | 3538.8          | 3538.9       |       |  |

# Figure S1

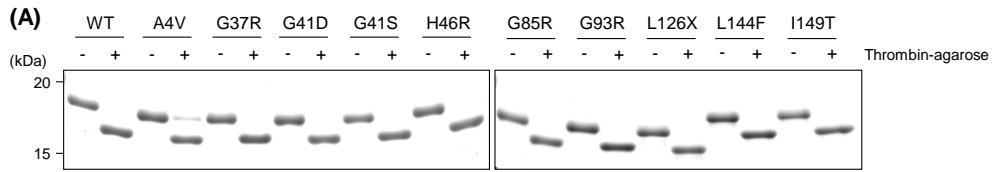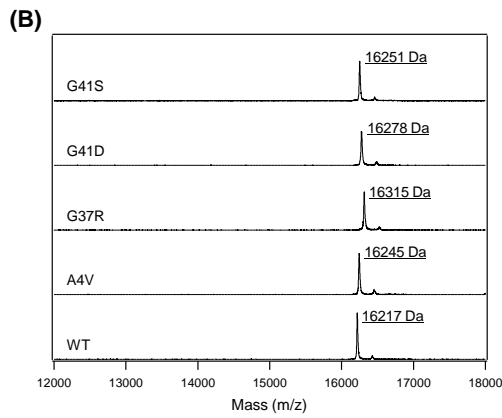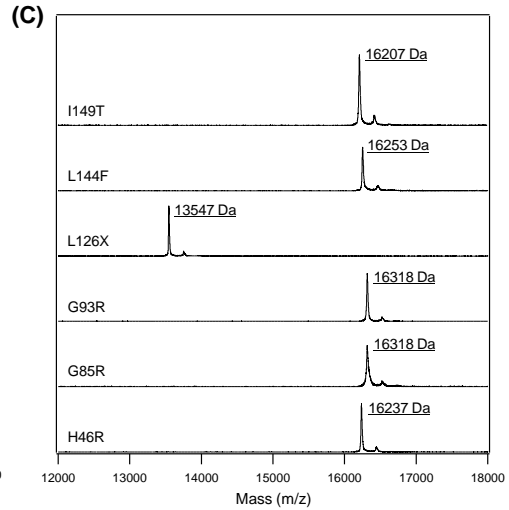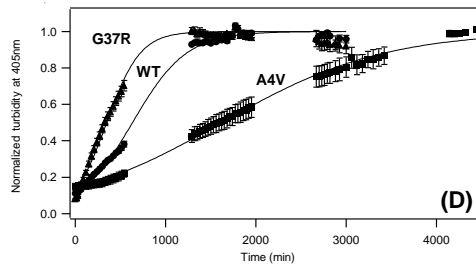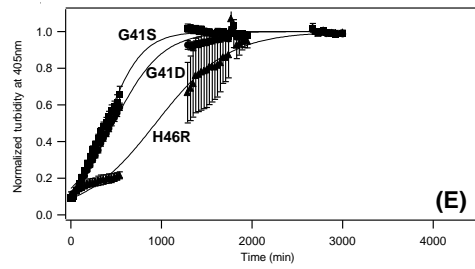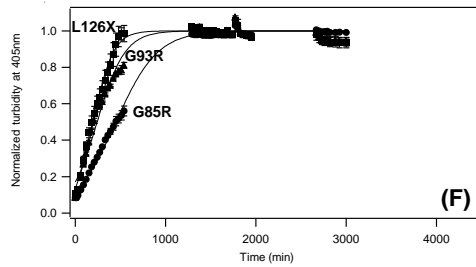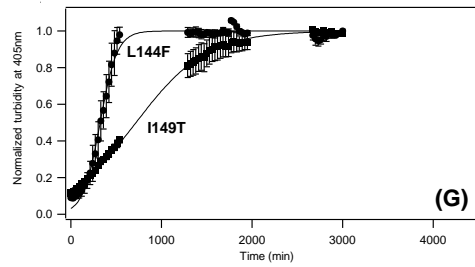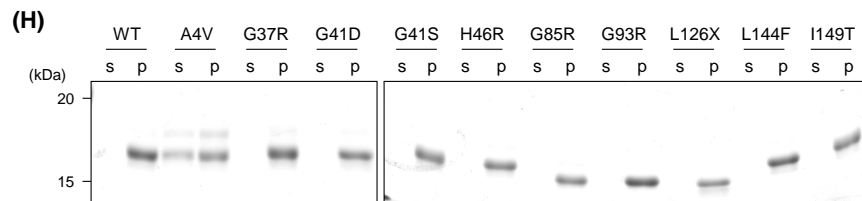

**Figure S2**

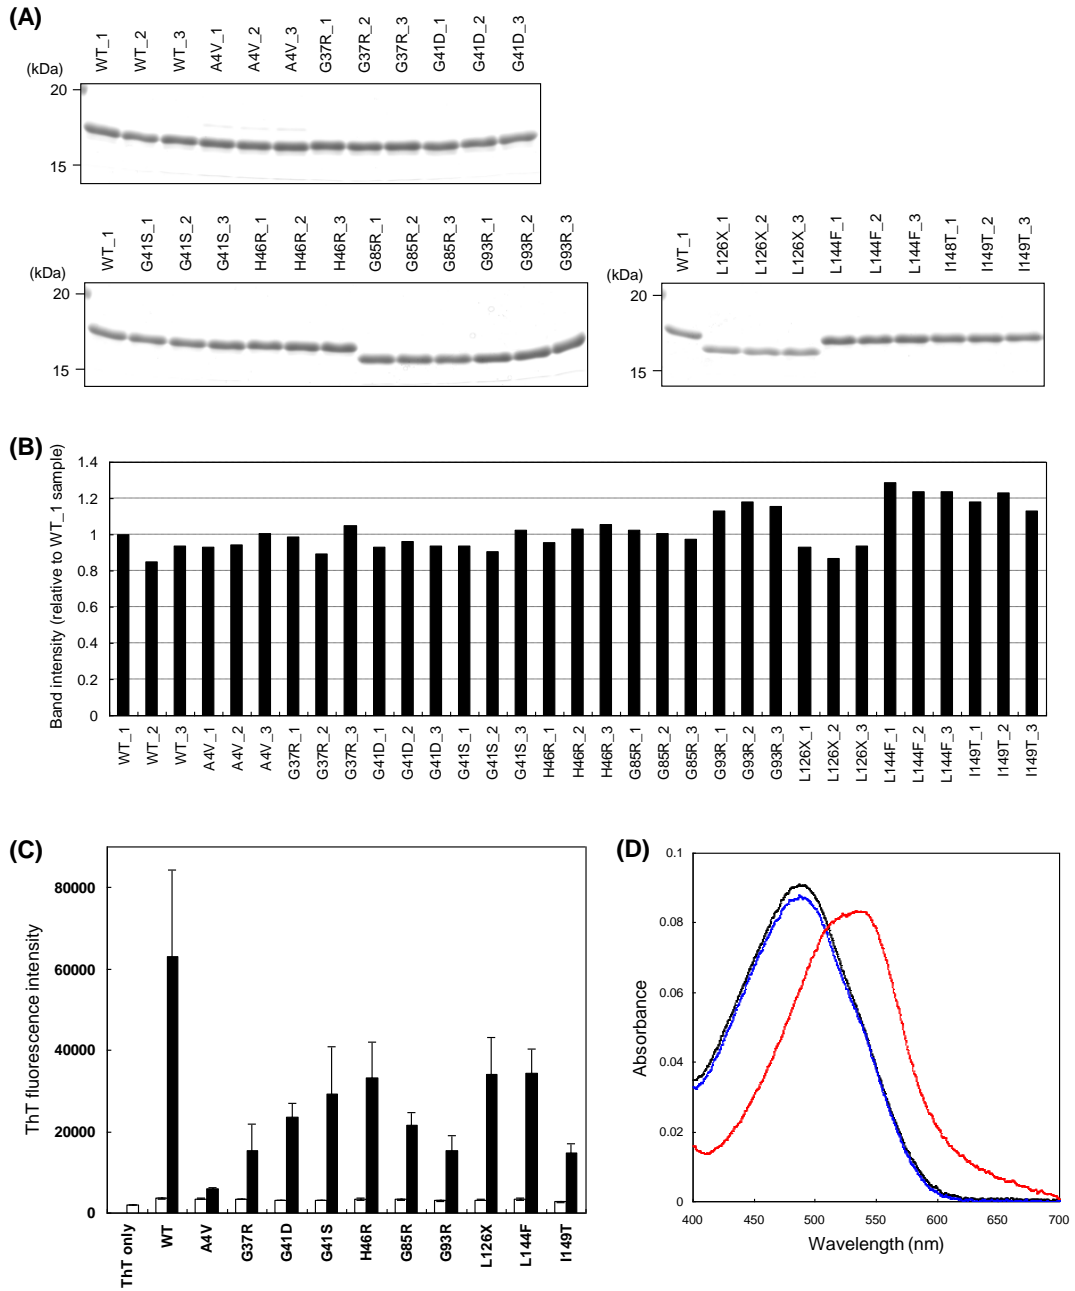

**Figure S3**

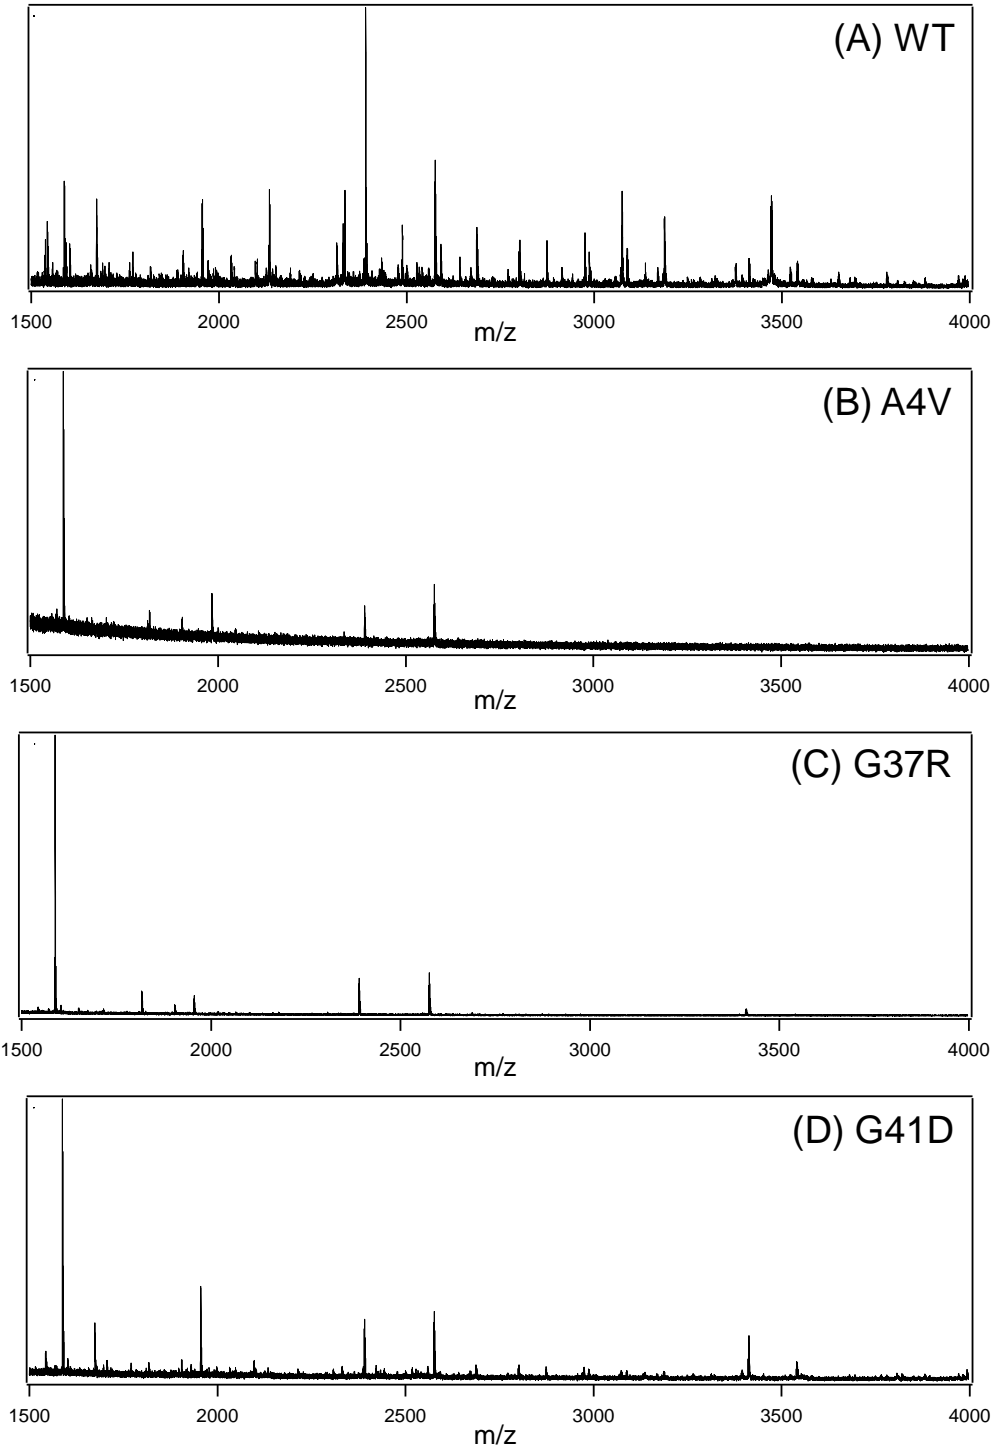

**Figure S3**

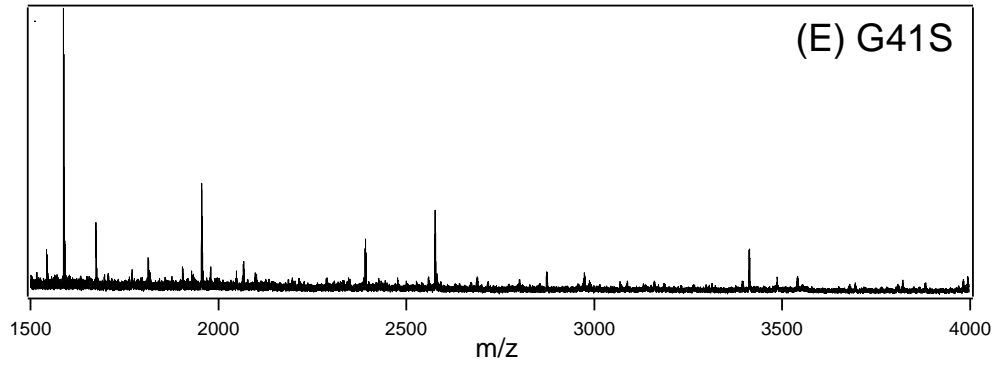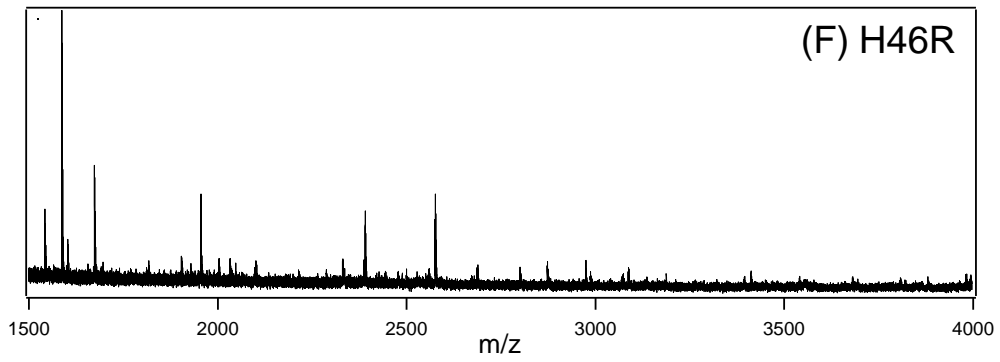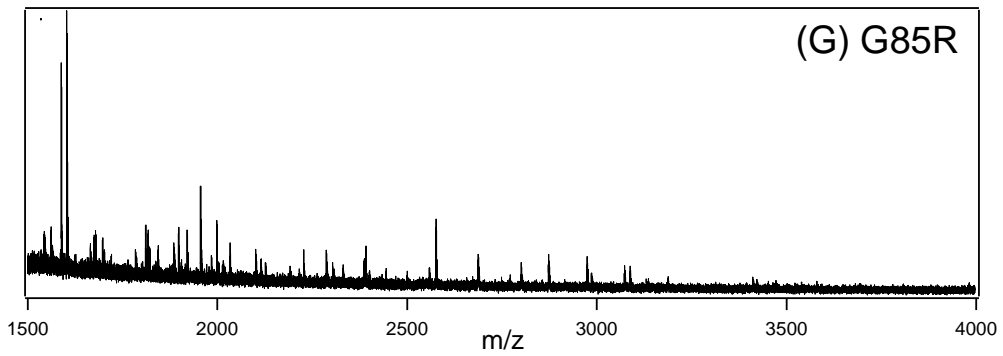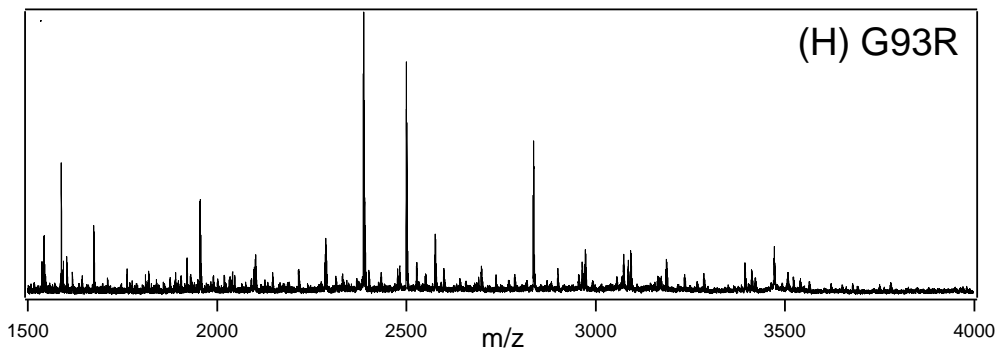



**Figure S3**

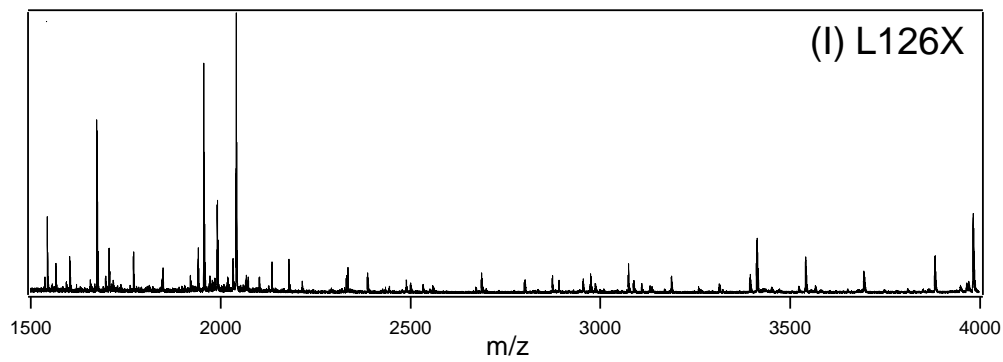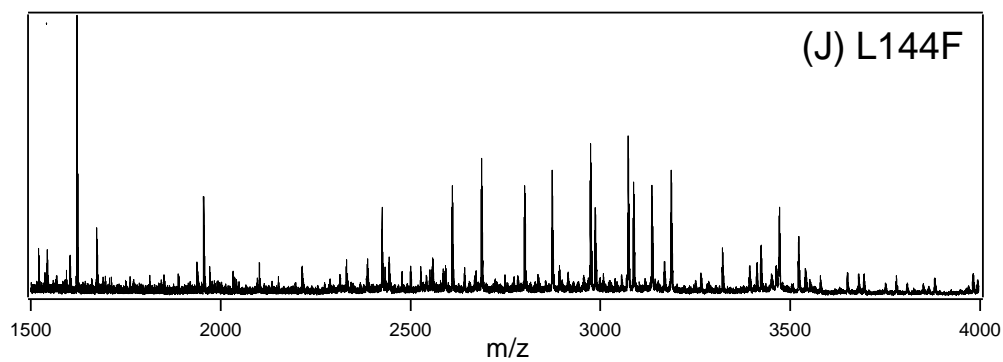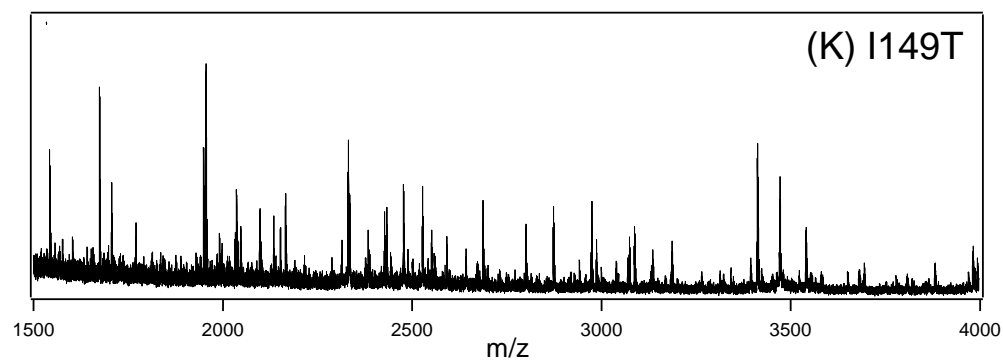

Figure S3

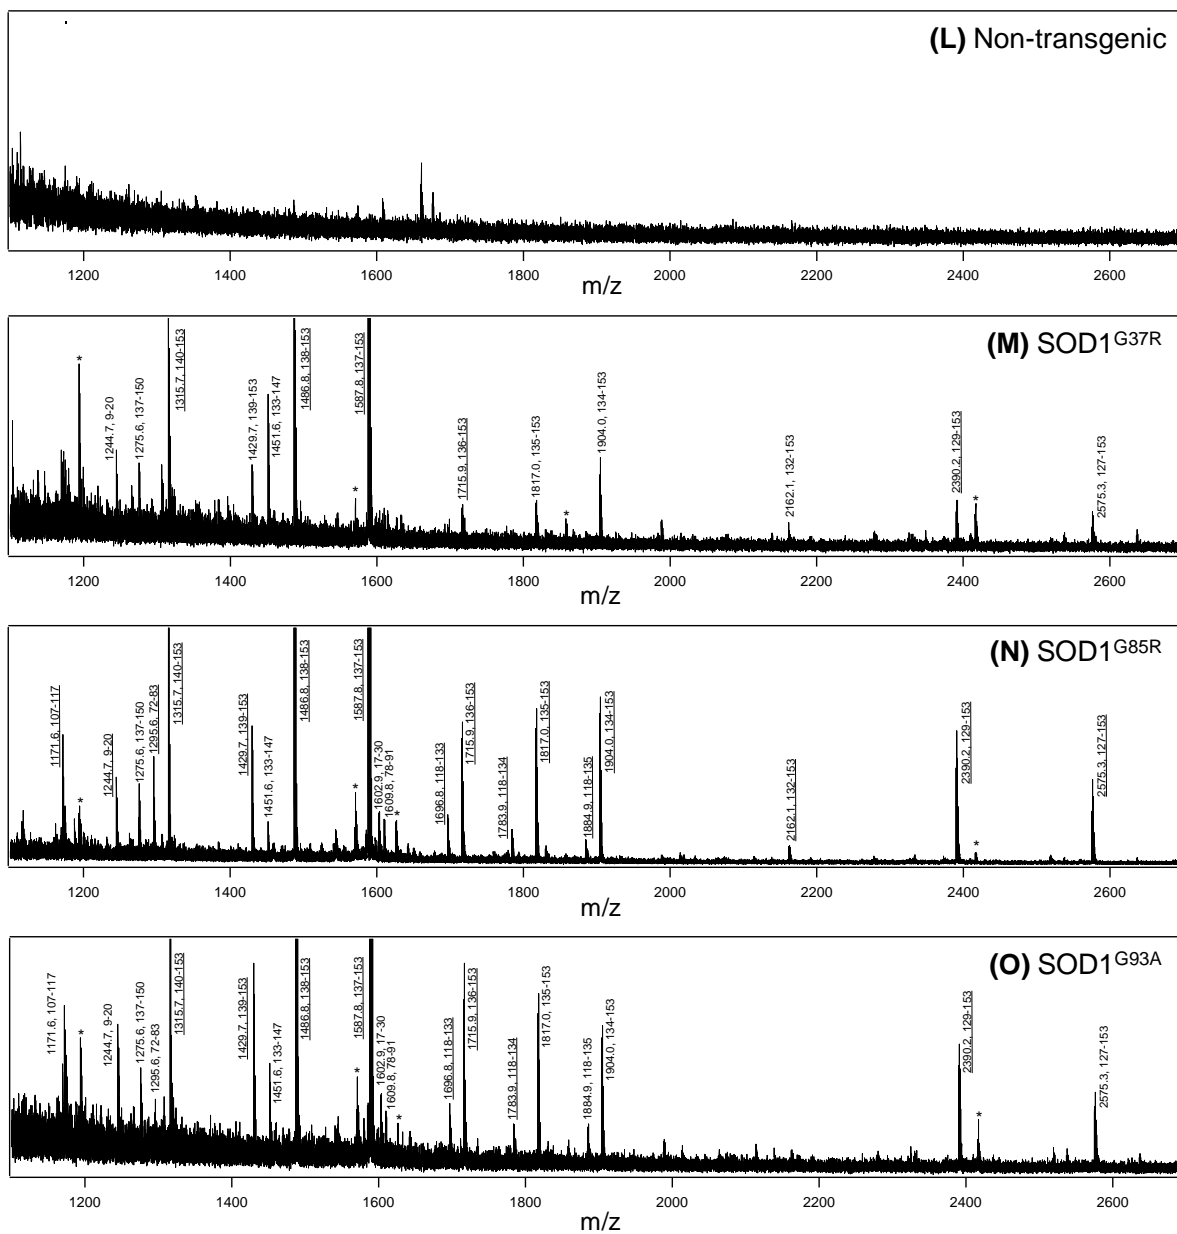

**Figure S4**

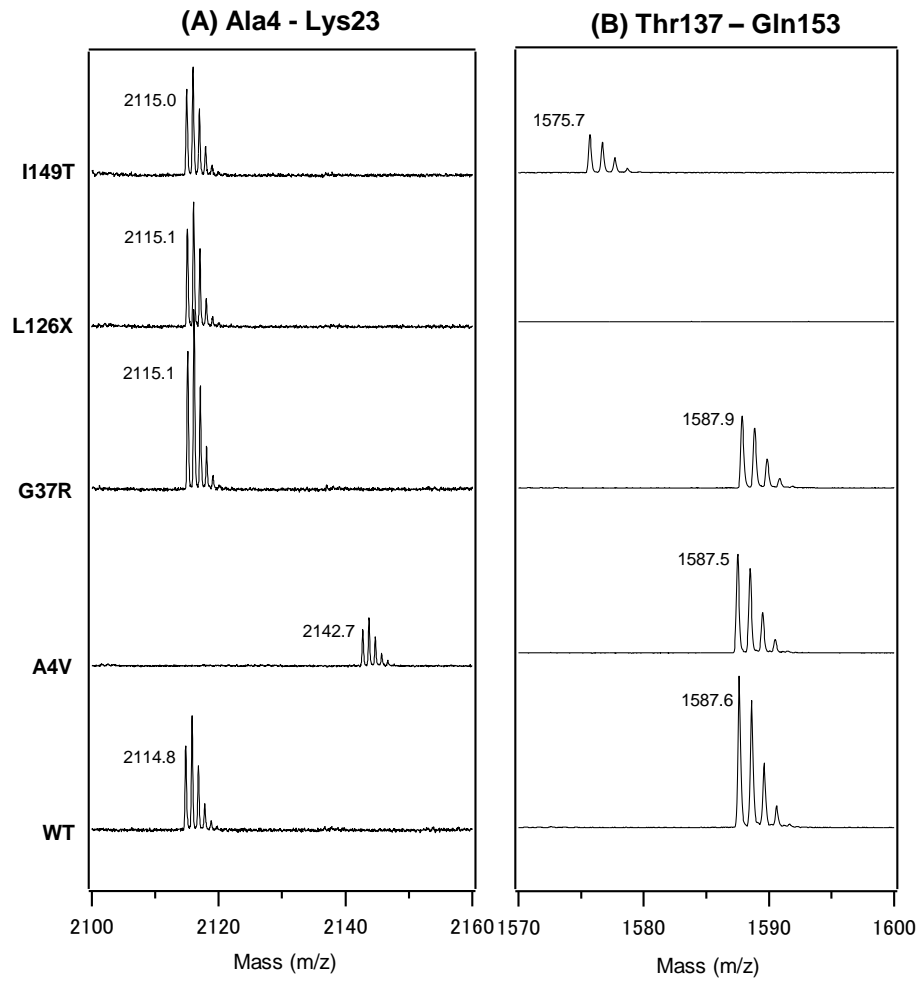

## LEGENDS FOR SUPPLEMENTAL FIGURES

**Fig. S1. Aggregation of SOD1 proteins after removal of an N-terminal His-tag in His-tagged SOD1 by thrombin agarose.** (A) 2  $\mu\text{g}$  of SOD1 before and after digestion with thrombin agarose was boiled in a Laemmli buffer containing 5 mM TCEP, loaded on a 12.5 % SDS-PAGE gel and stained with CBB. Mobility of the protein band increases after treatment with thrombin agarose, suggesting successful and efficient cleavage of a His-tag from SOD1. (B and C) Mass (m/z) of each SOD1 sample after cleaved with thrombin agarose was measured by MALDI-TOF mass spectrometry. Theoretical m/z of SOD1 without a His-tag is as follows; 16,217 in WT, 16,245 in A4V, 16,316 in G37R, G85R and G93R, 16,275 in G41D, 16,247 in G41S, 16,236 in H46R, 13,547 in L126X, 16,253 in L144F, and 16,205 in I149T. Observed m/z values indicated on each spectrum support successful removal of a His-tag sequence from tagged SOD1 proteins and confirm that SOD1 amino acid sequence remains intact. (D-G) Aggregation kinetics of SOD1 proteins monitored by turbidity changes at 405 nm: (D) WT, A4V and G37R, (E) G41D, G41S and H46R, (F) G85R, G93R and L126X, (G) L144F and I149T. Aggregation reaction was started by agitation of 100  $\mu\text{M}$  apo-SOD1<sup>SH</sup> at 1,200 rpm, 37 °C in an NNE buffer containing 5 mM DTT. Detailed experimental conditions were mentioned in Experimental procedures. Experiments were performed three times to estimate errors. (H) Formation of insoluble SOD1 pellets after aggregation reactions. After turbidity changes reached at a plateau (D-G), protein samples were ultracentrifuged at 110,000 x g for 30 min and fractionated into supernatant and pellets. Pellets were re-dissolved in the same volume of an NNE buffer containing 2 % SDS with that of supernatant. Then, equal volumes of supernatant (s) and pellets (p) were loaded on a 12.5 % SDS-PAGE gel and stained with CBB. Except A4V, all mutant and WT SOD1 proteins are found only in the pellet fraction, showing complete conversion of all SOD1 molecules into insoluble aggregates. In A4V, however, a supernatant fraction still contains SOD1, which is probably due to relatively sluggish kinetics of A4V aggregation (D).

**Fig. S2. Amyloid-like tinctorial properties of SOD1 aggregates.** (A) Quantification of SOD1 aggregates was performed by SDS-PAGE. Aliquots of SOD1 insoluble pellets re-suspended in water were boiled in a Laemmli buffer containing 5 mM TCEP, loaded on a 12.5 % SDS-PAGE gel and stained with CBB. Given that all of WT SOD1 molecules become insoluble pellets after aggregation reaction (Figs. S1D and H), we can reasonably assume the concentration of SOD1 molecules in the pellet fraction. Experiments were repeated three times (e.g. WT\_1, WT\_2 and WT\_3 indicated on top of gels), and the sample, WT\_1, was loaded as a loading control in different gels. (B) Densitometric analysis of protein bands in (A) was performed, and the band intensity relative to that of WT\_1 sample was plotted. Based upon this analysis, a relative concentration of SOD1 protein in each aggregated sample was estimated. (C) Distinct properties of SOD1 aggregates probed with ThT fluorescence intensity. After preparation of SOD1 aggregates by ultracentrifugation, 3  $\mu\text{M}$  SOD1 aggregates were mixed with 25  $\mu\text{M}$  ThT in an NNE buffer, and fluorescence intensity was measured (black filled bars). As a control, fluorescence intensity of 25  $\mu\text{M}$  ThT with 3  $\mu\text{M}$  soluble apo-SOD1<sup>SH</sup> was also examined (white open bars). Experiments were repeated three times to estimate errors. (D) An absorption spectrum of 10  $\mu\text{M}$  Congo red in an NNE buffer (black curve) is not affected by addition of 10  $\mu\text{M}$  apo-SOD1<sup>SH</sup> (blue curve). In contrast, addition of 10  $\mu\text{M}$  aggregated apo-SOD1<sup>SH</sup> red-shifts the absorption peak of Congo red (red curve), which is a typical spectroscopic change upon binding of Congo red with amyloid-like fibrillar protein aggregates.

**Fig. S3. Representative MALDI-TOF mass spectra of SOD1 aggregates treated with pronase.** (A-K) aggregates prepared from recombinant SOD1 protein with an indicated mutation, (L-O) aggregates prepared from spinal cords of transgenic mice expressing SOD1 with an indicated mutation. As

mentioned in Experimental procedures, SOD1 aggregates were first digested with pronase, ultracentrifuged to purify the pronase-resistant insoluble peptides and then analyzed by a MALDI-TOF mass spectrometry. Identification of mass peaks shown in (A-K) was summarized in Table S1. In (L-O), m/z values are indicated at the observed mass peaks, and peaks further confirmed by MS/MS analysis were underlined. Amino acid residues of the peptide corresponding to its mass peak are also indicated. Mass peaks with asterisks are not derived from SOD1 protein.

**Fig. S4. Mass peaks of the “unmodified” peptides in Alexa555-modified SOD1 aggregates after digestion with lysyl endopeptidase.** (A) Ala4 – Lys23 and (B) Thr137 – Gln153. As shown in (B), an unmodified Thr137 – Gln153 peptide was observed in WT, A4V and G37R aggregates; however, the Thr137-Gln153 peptide modified with Alexa555 was not observed (Fig. 3D, right). Similarly, an unmodified Ala4 – Lys23 peptide was observed in all five SOD1 aggregates (A), but the Alexa555-modified peptide was not detected (Fig. 3A, right). These results suggest that no observed mass peaks of Alexa555-modified Ala4 – Lys23 or Thr137 – Gln153 peaks (Figs. 3A and D) are due to less reactivity of each peptide toward Alexa555 but not due to inefficient digestion of the modified samples by pronase. Because L126X is a truncated SOD1 at Leu126, a peptide spanning from Thr137 to Gln153 (B) is not detected.
